CORRECTION

# Correction: Retraction: Heat Shock Protein 27 Is Spatially Distributed in the Human Placenta and Decreased during Labor

The *PLOS ONE* Editors

After this retraction notice [1] was posted, Akrem Abdulsid notified *PLOS ONE* that she had changed her position on the editorial decision in this case. The final paragraph of the retraction notice is hereby updated to the following: AA did not agree with the retraction. KH and FL did not respond.

## Reference

1. The *PLOS ONE* Editors (2018) Retraction: Heat Shock Protein 27 Is Spatially Distributed in the Human Placenta and Decreased during Labor. *PLoS ONE* 13(6): e0199803. <https://doi.org/10.1371/journal.pone.0199803> PMID: 29933401

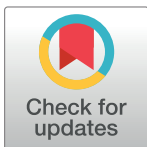

## OPEN ACCESS

**Citation:** The *PLOS ONE* Editors (2019) Correction: Retraction: Heat Shock Protein 27 Is Spatially Distributed in the Human Placenta and Decreased during Labor. *PLoS ONE* 14(1): e0211127. <https://doi.org/10.1371/journal.pone.0211127>

**Published:** January 16, 2019

**Copyright:** © 2019 The PLOS ONE Editors. This is an open access article distributed under the terms of the [Creative Commons Attribution License](https://creativecommons.org/licenses/by/4.0/), which permits unrestricted use, distribution, and reproduction in any medium, provided the original author and source are credited.
